# Supplementary material
Source: Springer Nature journal article supplement (https://www.springermedizin.de/resource/supplementary/13075_2009_2747_MOESM4_ESM.pdf/9692792)

mean 34 IFN genes

ns

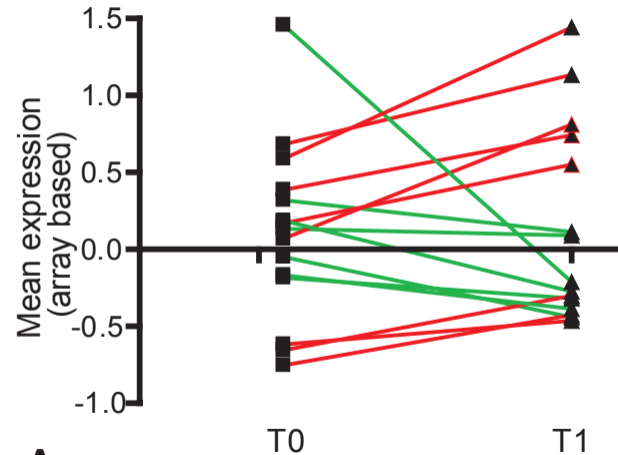

A.

mean 3 IFN genes  
(RSAD2, IFI44L, OAS1)

ns

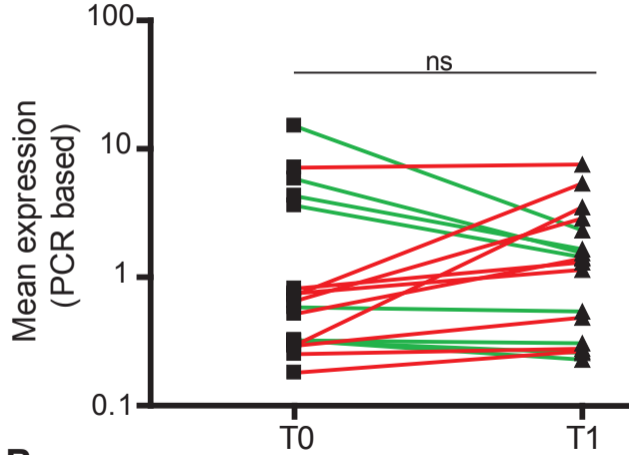

B.

Supplement: MOESM4 [file 9692792]
